Hospitalier Regional Universitaire, Hospitalier de Rangueil, Toulouse, France); Jan Patrick Roesner, M.D. (Clinic for Anesthesia and Critical Care Medicine, University Hospital of Rostock, Rostock, Germany), Rob Tenbrinck, M.D., Ad JJC Bogers, M.D., Bert G Mik, M.D. (Departments of Anesthesiology and Cardiothoracic Surgery, Thorax Center, Rotterdam, The Netherlands); Alain Coiffic, M.D. (Service d'Anesthésie-Réanimation II, Center Hospitalier Universitaire de Bordeaux, Bordeaux, France); Jochen Renner, M.D., Markus Steinfath, M.D., Helga Francksen, M.D., Ole Broch, M.D., Assad Haneya, M.D. (Klinik für Anästhesiologie und Operative Intensivmedizin, UniversitätsKlinikum Schleswig-Holstein, Campus Kiel, Kiel, Germany); Manuella Schaller, M.Sc. (Air Liquide Santé International, Jouy-en-Josas, France); Patrick Guinet, M.D., Lauren Daviet, M.D., Corinne Brianchon, M.D., Sebastien Rosier, M.D. (Department of Anesthesia, Hôpital Pontchaillou, Rennes, France); Jean-Jacques Lehot, M.D. (Department of Anesthesia and Intensive Care, Hôpital Cardiovasculaire et Pneumologique Louis Pradel, Bron, France); Hauke Paarmann, M.D., Julika Schön, M.D., Thorsten Hanke, M.D., Joachym Ettel, M.D., Silke Olsson (Department of Anesthesiology and Intensive Care Medicine, University of Lübeck, Lübeck, Germany); Stefan Klotz, M.D. (Department of Cardiac and Thoracic Vascular Surgery, University of Lübeck, Lübeck, Germany); Amir Samet, M.D., Giedrius Laurinenas, M.D., Adrien Thibaud, M.D., Mircea Cristinar, M.D., Olivier Collanges, M.D., François Levy, M.D. (Service d'Anesthésie Réanimation Chirurgicale, Hôpitaux Universitaires de Strasbourg, Strasbourg, France); Rolf Rossaint, M.D., Ana Stevanovic, M.D., Gereon Schaelte, M.D., and Christian Stoppe, M.D. (Department of Anesthesiology, University Hospital RWTH Aachen, Aachen, Germany); Nora Ait Hamou, M.D., Sarah Hariri, M.D., Astrid Quessard, M.D., Aude Carillion, M.D. (Department of Anesthesia and Intensive Care, Institut de Cardiologie - Chirurgie Cardiaque, Hôpital Pitié Salpêtrière, Paris, France); Hélène Morin, M.D., Jacqueline Silleran, M.D., David Robert, M.D., and Anne-Sophie Crouzet, B.S.N. (Service d'Anesthésie et Réanimation Chirurgicale, Hôpital G&R Laënnec, Center Hospitalier Universitaire de Nantes, Nantes, France); Kai Zacharowski, M.D., Christian Reyher, M.D., Sonja Iken, M.D. (Clinic of Anesthesiology, Intensive Care Medicine and Pain Therapy, University Hospital Frankfurt am Main, Frankfurt am Main, Germany); Nina C. Weber, Ph.D., Marcus Hollmann, Ph.D., Susanne Eberl, M.D. (Department of Anesthesiology, Academic Medical Center, University of Amsterdam, Amsterdam, The Netherlands); Giovanni Carriero, M.D., Daria Colacchi, M.D., Alessandra Di Persio M.D. (Department of Anesthesia and Intensive Care, Policlinico "Umberto I," "La Sapienza," University of Rome, Rome, Italy); Olivier Fourcade, M.D. (Chirurgie Cardiovasculaire - Service de Réanimation, Center Hospitalier Regional Universitaire, Hospitalier de Rangueil, Toulouse, France); Stefan Bergt, M.D., Angela Alms, M.D. (Clinic for Anesthesia and Critical Care Medicine, University Hospital of Rostock, Rostock, Germany).

(Accepted for publication May 16, 2018.)

## Editorial Views and Policies

### To the Editor:

We thank Drs. Kharasch and Houle<sup>1</sup> for commenting on an article<sup>2</sup> and an editorial<sup>3</sup> published in *Anaesthesia* in their Editorial Views. It would be more usual for questions to be posed to the authors of a journal article by means of correspondence to the primary journal, and we are sure that Drs. Carlisle, Loadman, and McCulloch would be delighted to respond

to any such letters. We would therefore refer the readers of *ANESTHESIOLOGY* to such correspondence in *Anaesthesia* for further discussion of these articles and the issues arising.

In response to the specific suggestions made about the editorial policy of *Anaesthesia*, the Journal stands by its decision (and is supported in doing so by the Editorial Board) to screen all submitted randomized controlled trials for data distribution.<sup>4</sup> However, we would like to point out that no article has ever been, or will ever be, rejected based on this screening alone<sup>5</sup>; a finding that a submission appears to have an unusual distribution of data is always followed by a request to the authors for original trial data,<sup>6</sup> and it is the analysis of these data, along with the authors' responses to further questioning, that leads to any decision to accept or reject. Many submissions initially flagged using this screening method are found to have done so through authors' errors rather than intentional deception or worse.

*Anaesthesia* and its Editorial Board also stand by the suggestion that extreme distributions of baseline data merit further investigation, the expectation being that many, if not most, will turn out to be due to errors. The scientific record must be reliable, and *Anaesthesia* is happy to take the lead in checking past, as well as current/future, publications.

## Competing Interests

Dr. Klein is current Editor-in-Chief of *Anaesthesia*. Dr. Yentis is the Immediate Past Editor-in-Chief of *Anaesthesia*. Dr. Clyburn is Chair of the Editorial Board of *Anaesthesia* and President of the Association of Anaesthetists of Great Britain and Ireland (London, United Kingdom).

**Andrew A. Klein, M.B.B.S., F.R.C.A., Steve M. Yentis, B.Sc., M.B.B.S., M.A., M.D., Paul A. Clyburn, M.B.B.S., F.R.C.A.** Papworth Hospital, Papworth Everard, Cambridge, United Kingdom (A.A.K.). Andrew.klein@nhs.net

## References

1. Kharasch ED, Houle TT: Errors and integrity in seeking and reporting apparent research misconduct. *ANESTHESIOLOGY* 2017; 127:733–7
2. Carlisle JB: Data fabrication and other reasons for non-random sampling in 5087 randomised, controlled trials in anaesthetic and general medical journals. *Anaesthesia* 2017; 72:944–52
3. Loadman JA, McCulloch TJ: Widening the search for suspect data: Is the flood of retractions about to become a tsunami? *Anaesthesia* 2017; 72:931–5
4. Klein AA: What *Anaesthesia* is doing to combat scientific misconduct and investigate data fabrication and falsification. *Anaesthesia* 2017; 72:3–4
5. Carlisle JB, Dexter F, Pandit JJ, Shafer SL, Yentis SM: Calculating the probability of random sampling for continuous variables in submitted or published randomised controlled trials. *Anaesthesia* 2015; 70:848–58
6. Carlisle JB: The analysis of 168 randomised controlled trials to test data integrity. *Anaesthesia* 2012; 67:521–37

(Accepted for publication May 17, 2018.)
